# Supplementary material
Source: PubMed Central journal article supplement (PMC2797273)

# Figure S1

**SK-Hep-1**

**Anchorage independent growth**

**miR-122 mimetic**

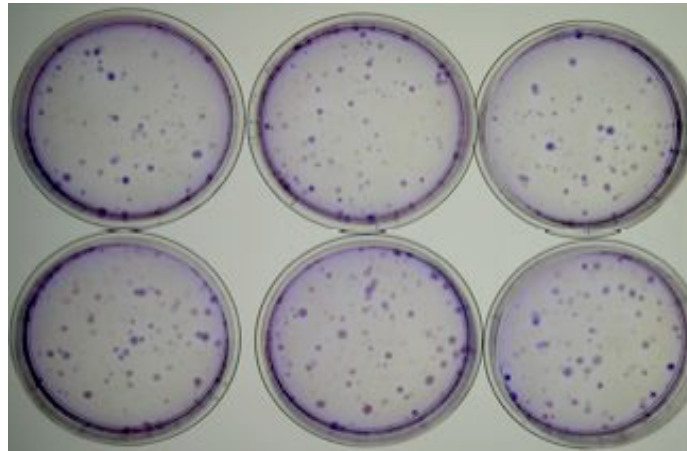

**Control RNA**

# Figure S2

## Hep3B

### A Northern blot

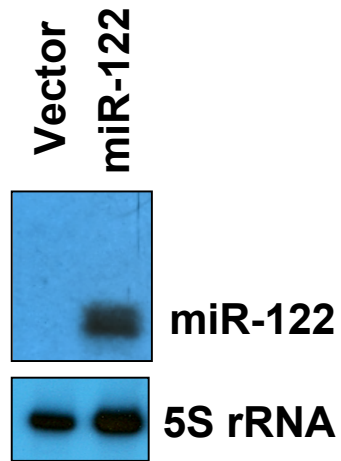

### B Clonogenic survival

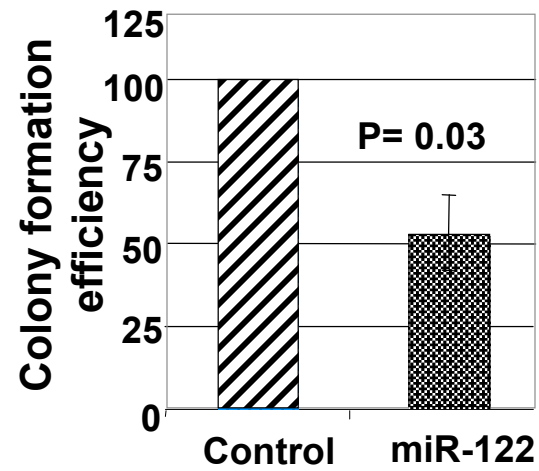

# Figure S3

## HepG2

### A Northern blot analysis

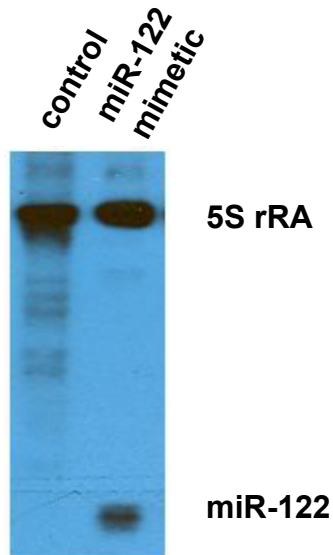

### B MTT assay

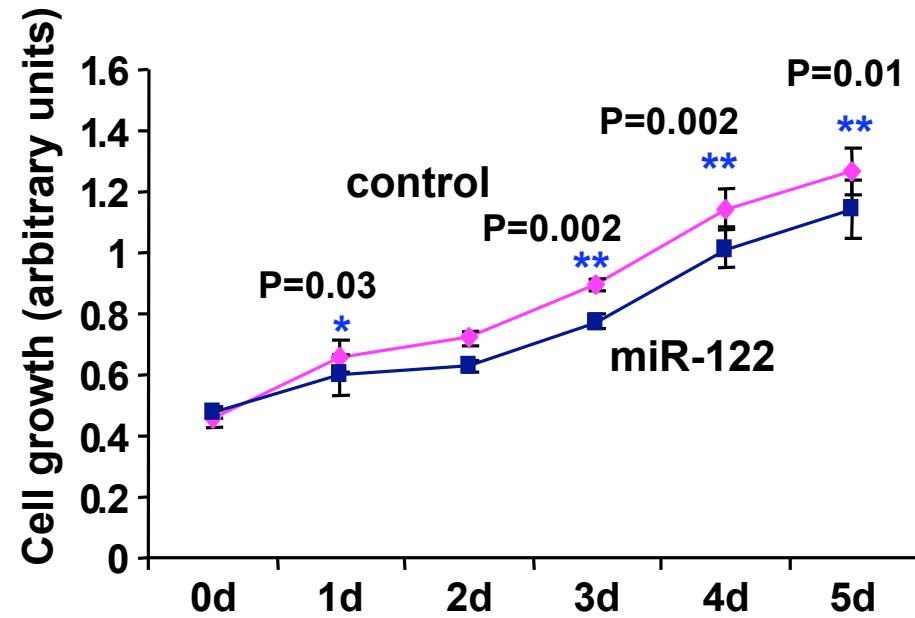

### C

#### i. Vector

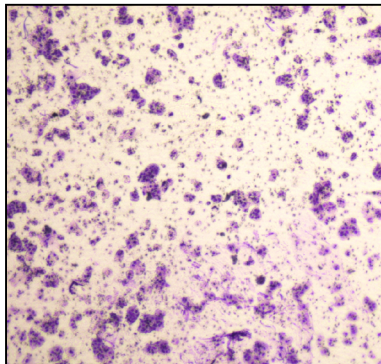

#### Invasion assay

#### miR-122

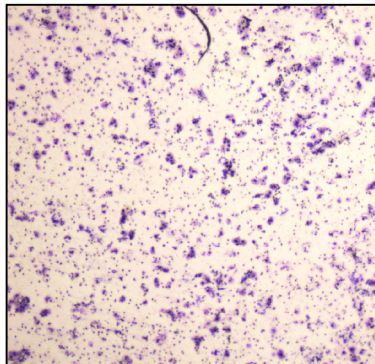

#### ii.

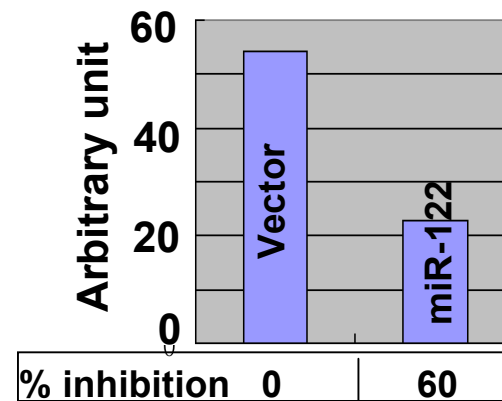

**Figure S4**

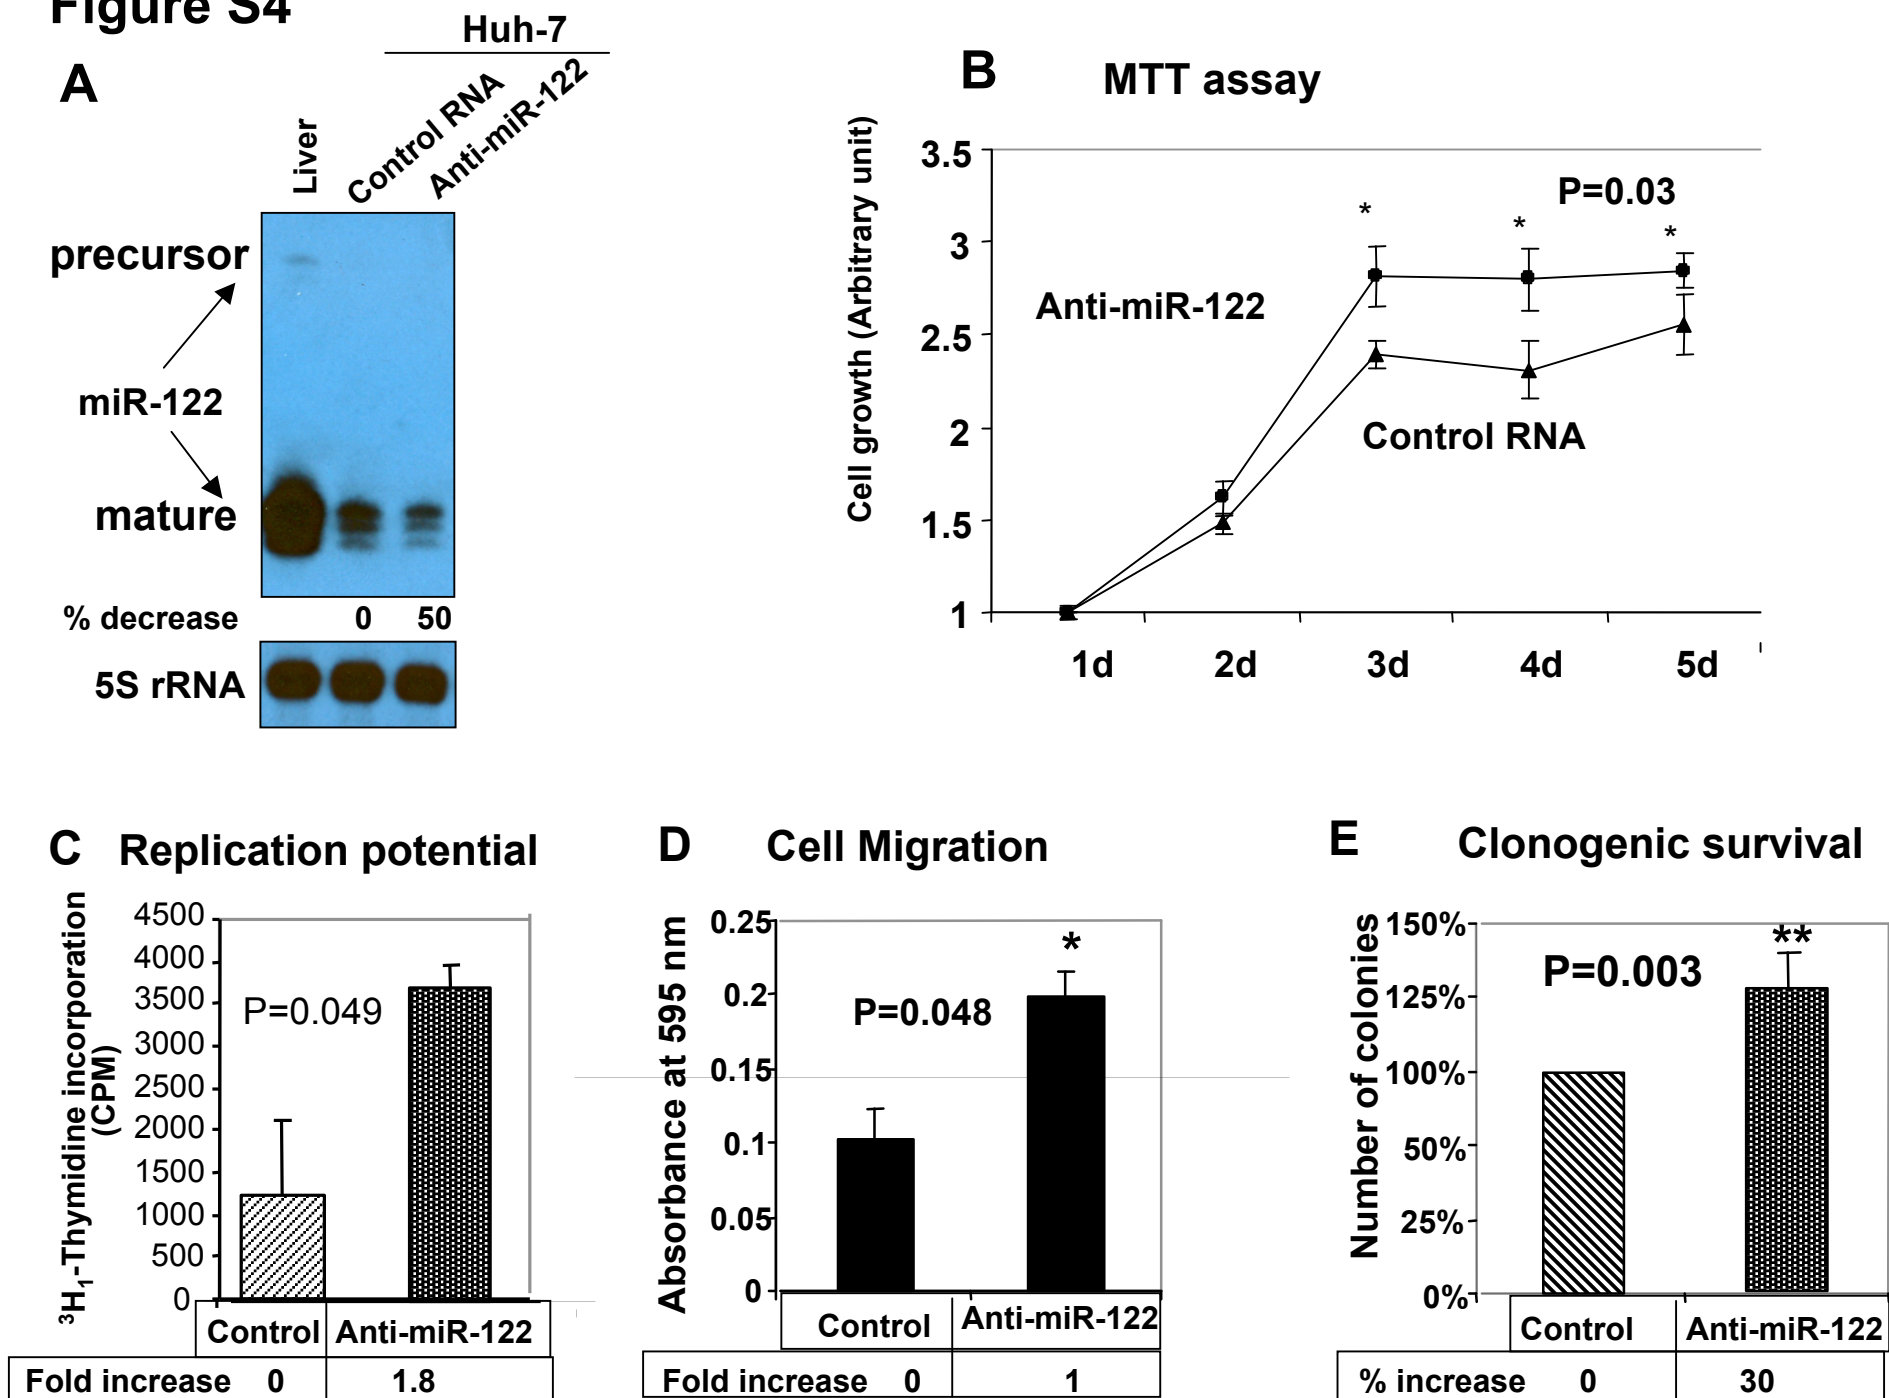

**Figure S5**

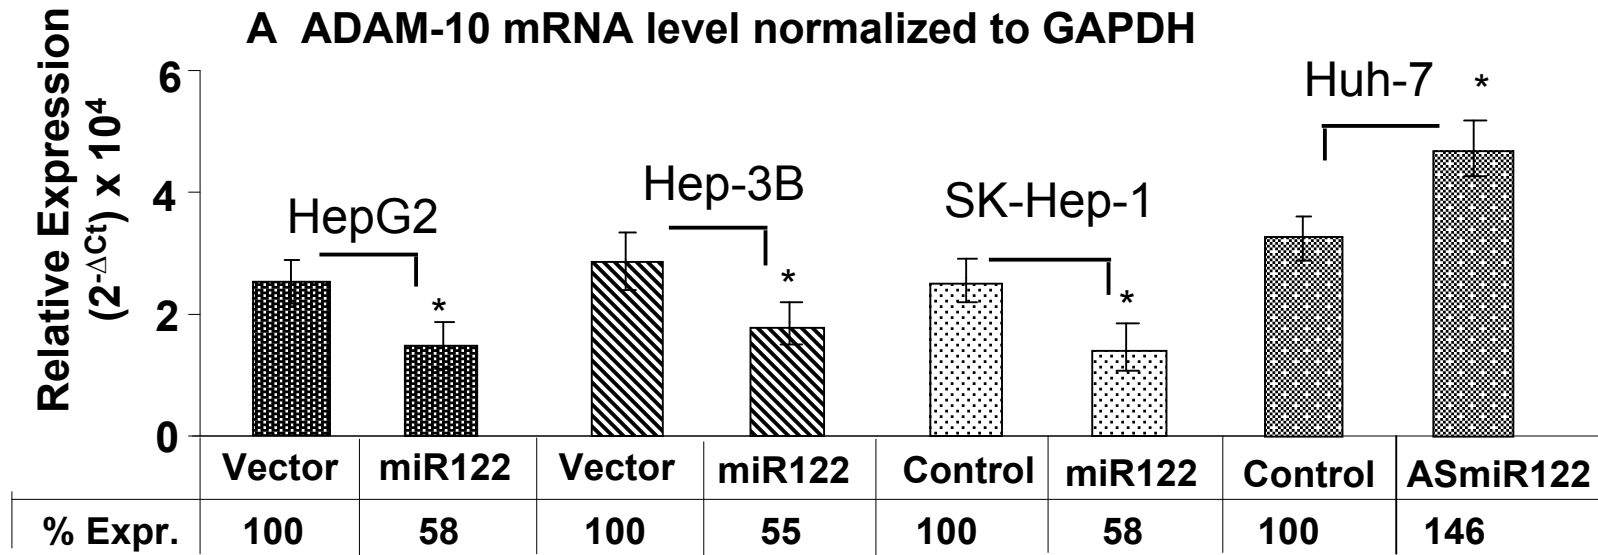

**B ADAM-17 mRNA level**

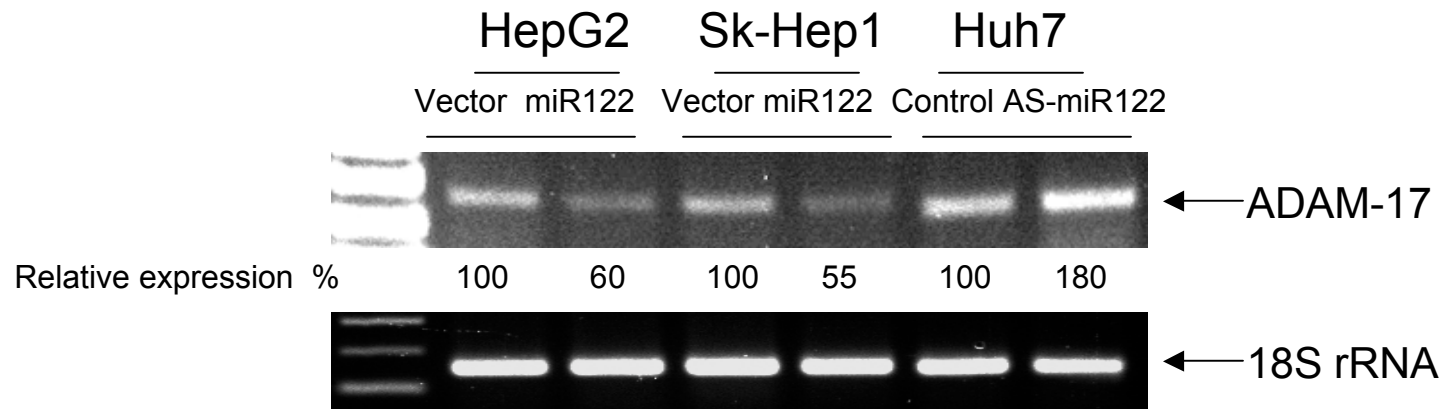

Figure S6

A

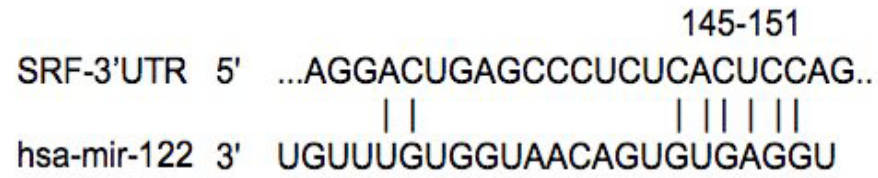

B Luciferase assay

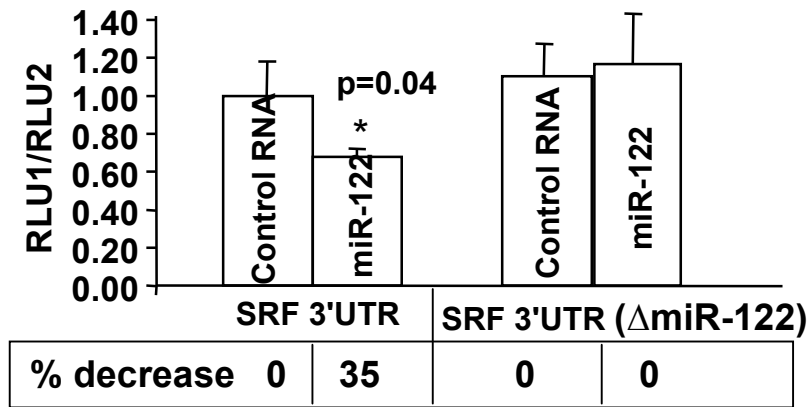

**Figure S7**

**A IGF1R 3-UTR**

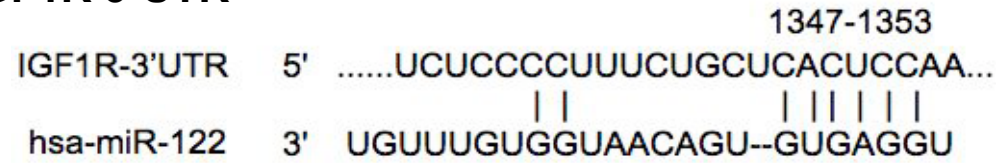

**B Luciferase assay**

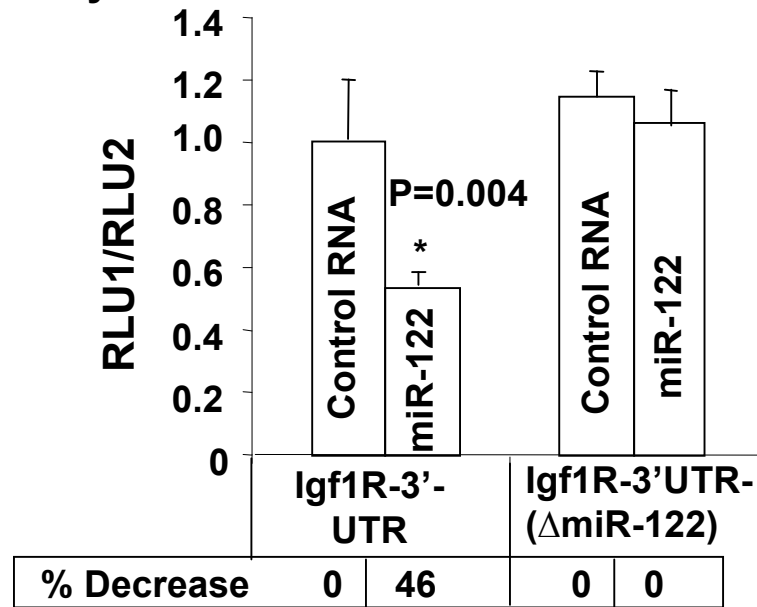

Figure S7

C IGF1R real-time RT-PCR

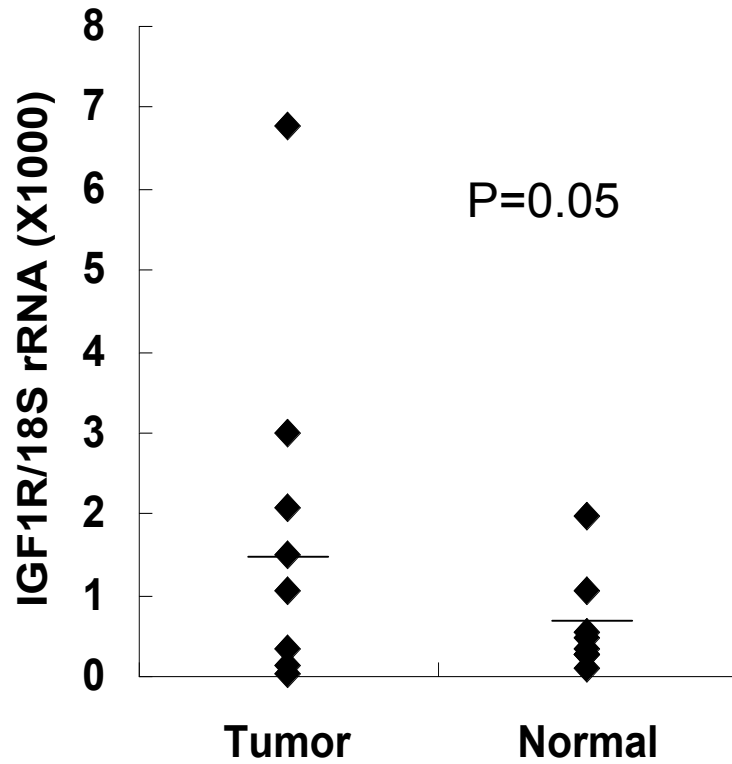

D Inverse correlation of IGFR1 and miR-122 Levels

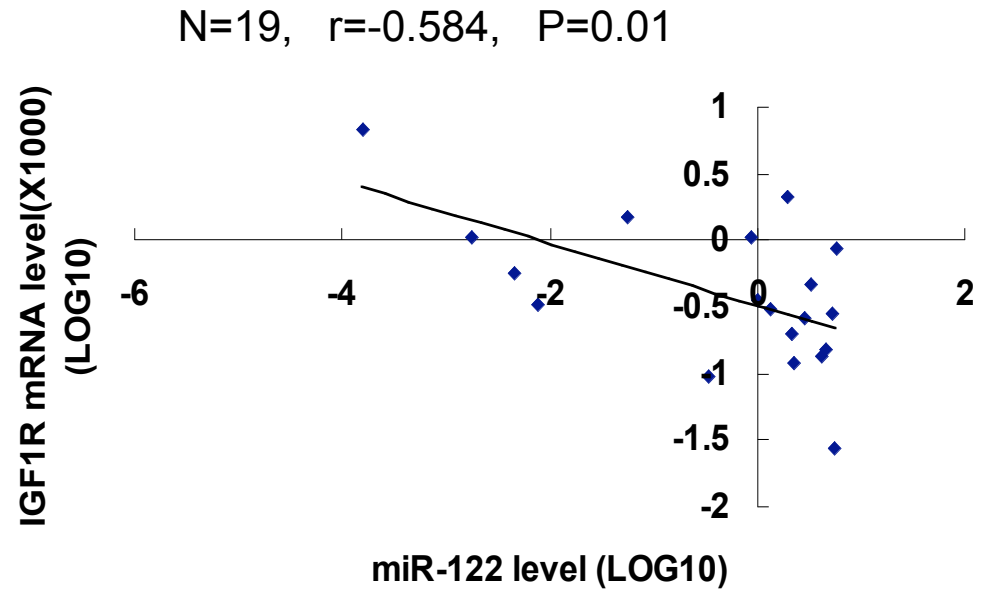



**Figure S8**

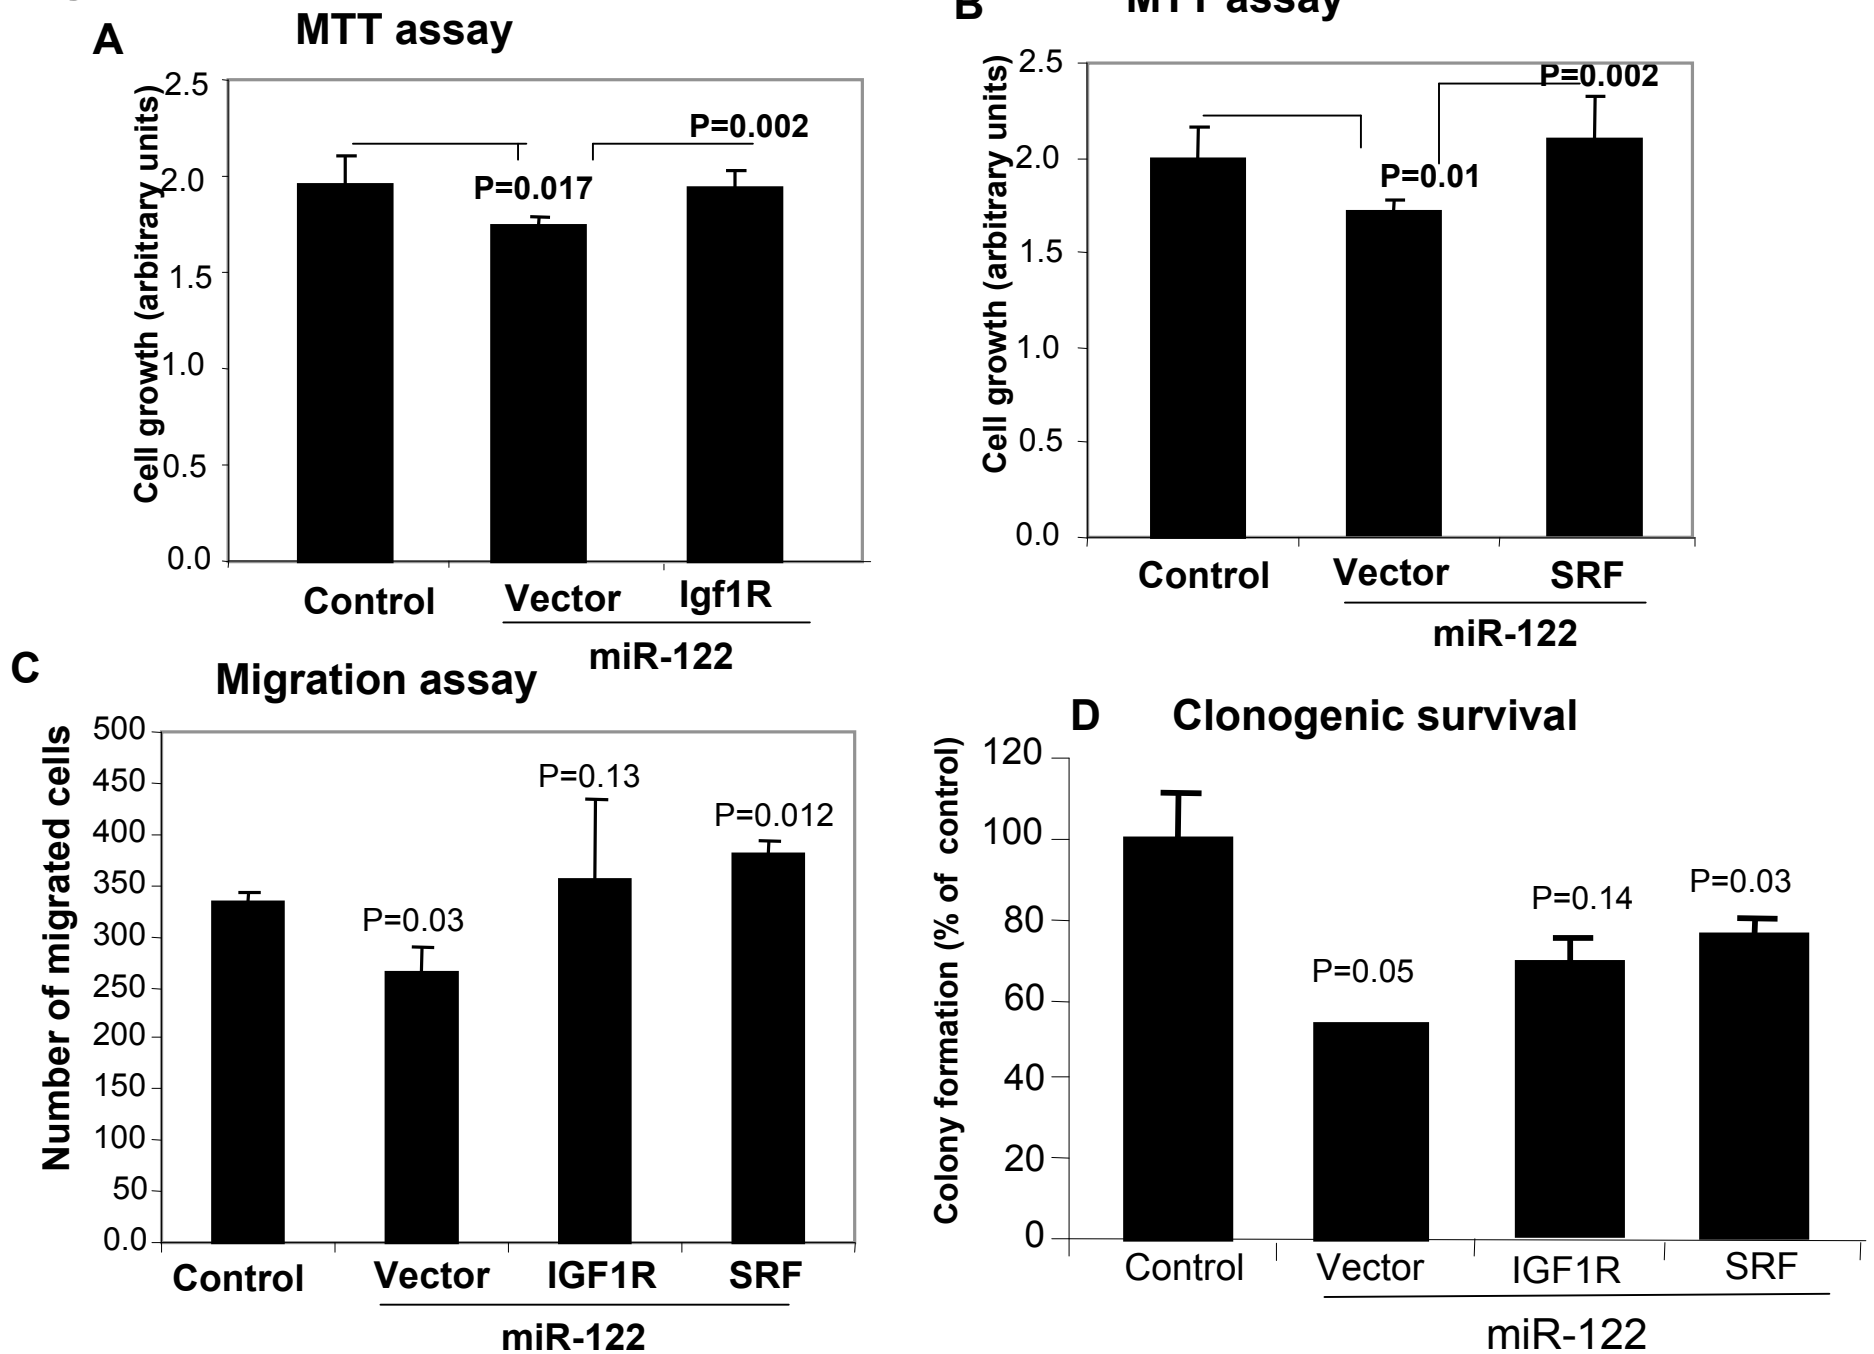

**Figure S9**

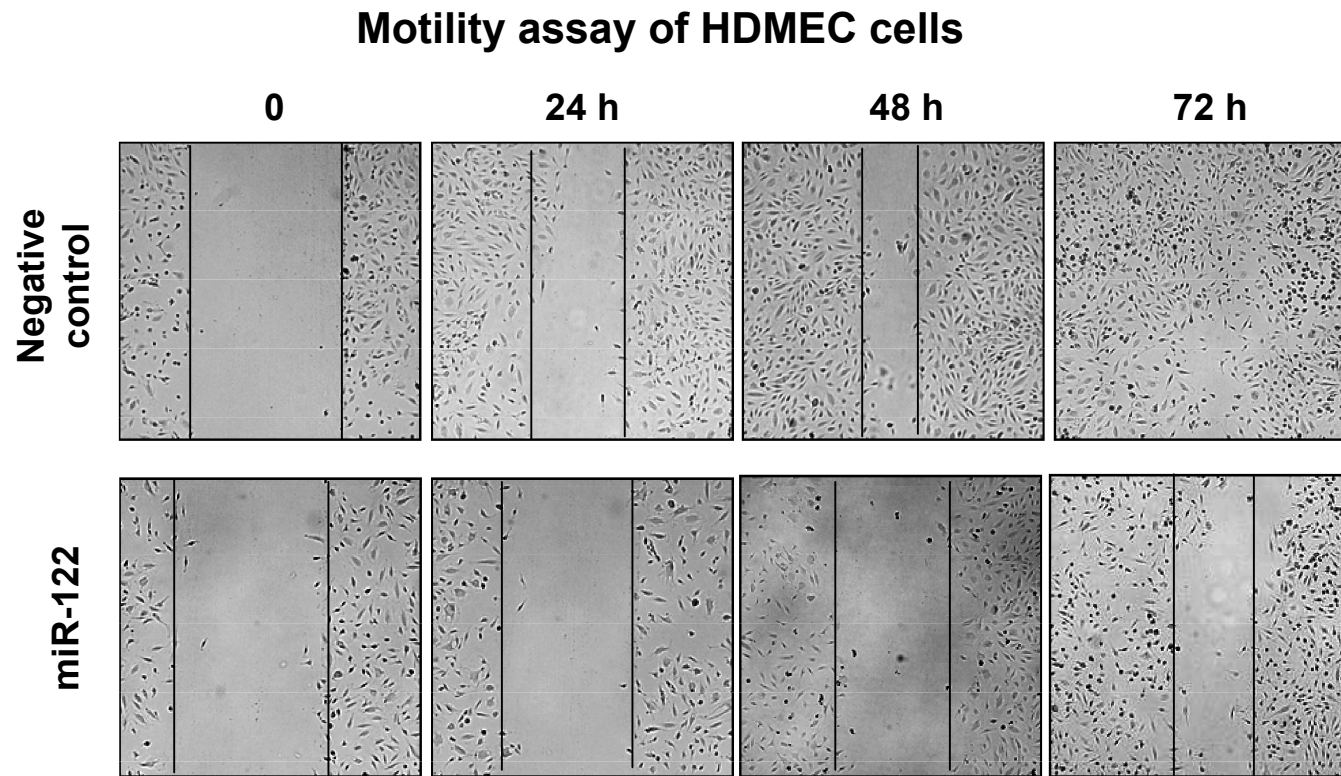

**Figure S10**

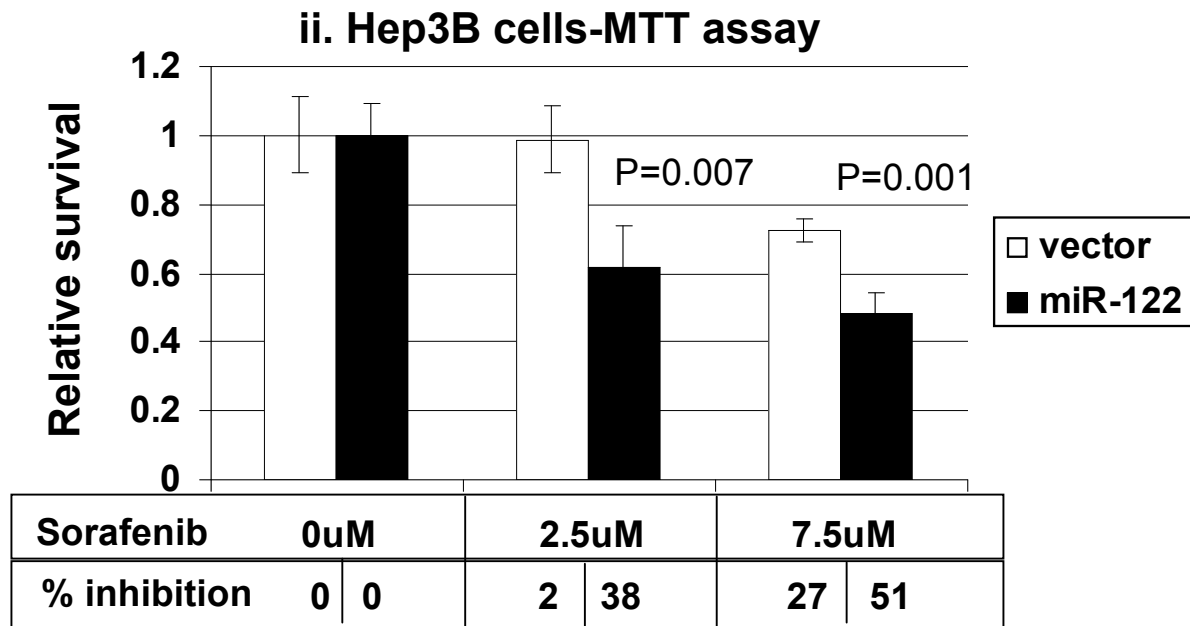

Supplement: supp_M109.016774_jbc.M109.016774-2.pdf [file supp_M109.016774_jbc.M109.016774-2.pdf]
